# Supplementary material for: Efficient photocatalytic reduction of dinitrogen to ammonia on bismuth monoxide quantum dots
Source: Royal Society of Chemistry journal article supplement (doi:10.1039/c6ta09275f), 2016-11-15
Supplement: c6ta09275f1.pdf [file c6ta09275f1.pdf]

## Efficient Photocatalytic Reduction of Dinitrogen to Ammonia on Bismuth Monoxide Quantum Dots

Songmei Sun<sup>1</sup>, Qi An<sup>2</sup>, Wenzhong Wang<sup>1\*</sup>, Ling Zhang<sup>1</sup>, Jianjun Liu<sup>1\*</sup>, William A. Goddard III<sup>2</sup>

<sup>1</sup>State Key Laboratory of High Performance Ceramics and Superfine Microstructure, Shanghai Institute of Ceramics, Chinese Academy of Sciences, Shanghai 200050, P. R. China

<sup>2</sup>Division of Chemistry and Chemical Engineering, California Institute of Technology, Pasadena, California 91125, United States

\*Address correspondence to [wzwang@mail.sic.ac.cn](mailto:wzwang@mail.sic.ac.cn), [jliu@mail.sic.ac.cn](mailto:jliu@mail.sic.ac.cn)

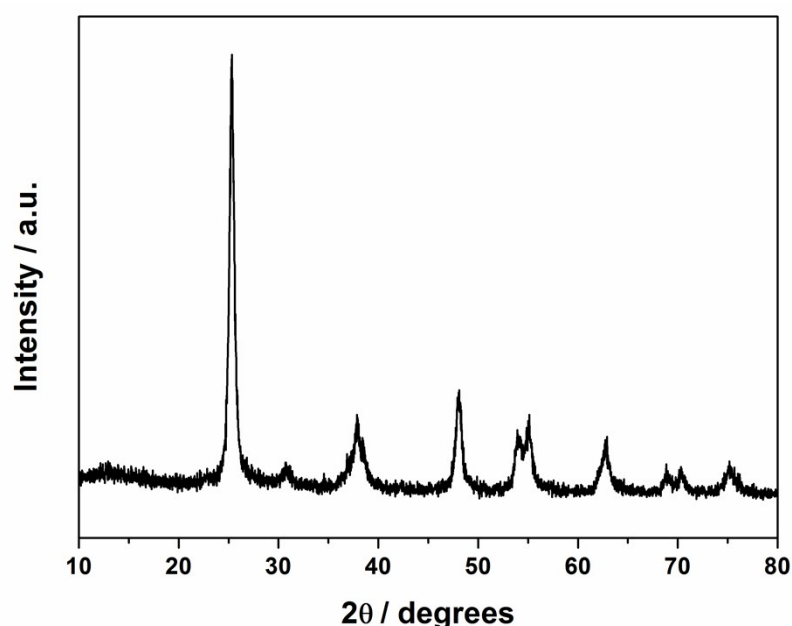

Figure S1 XRD pattern of the as-prepared 0.2%wt Fe-TiO<sub>2</sub> sample.

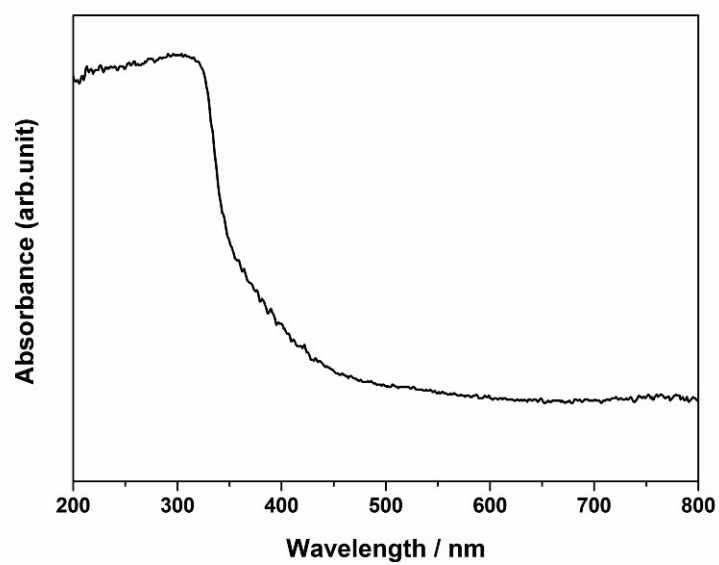

Figure S2. UV-vis diffuse reflection spectrum of the BiO particles.

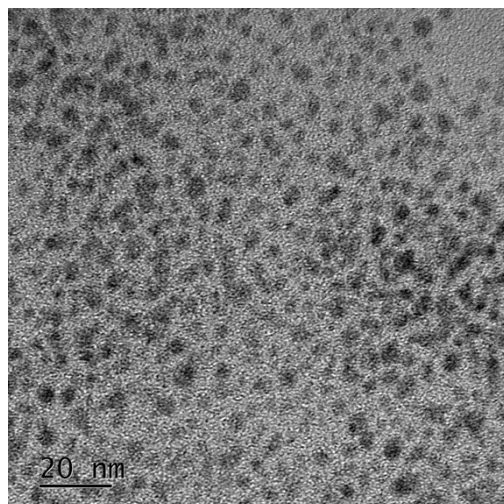

Figure S3 TEM image of the BiO quantum dots after cycles of photocatalytic reaction

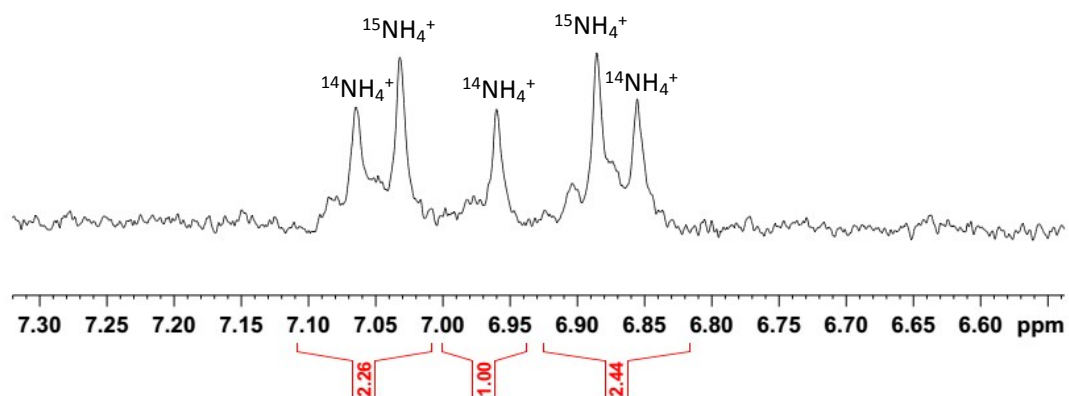

Figure S4  $^1\text{H}$  NMR spectrum of the obtained ammonia from photocatalytic  $\text{N}_2$  reduction using 50%  $^{15}\text{N}_2$  and 50%  $^{14}\text{N}_2$  as the purge gas.

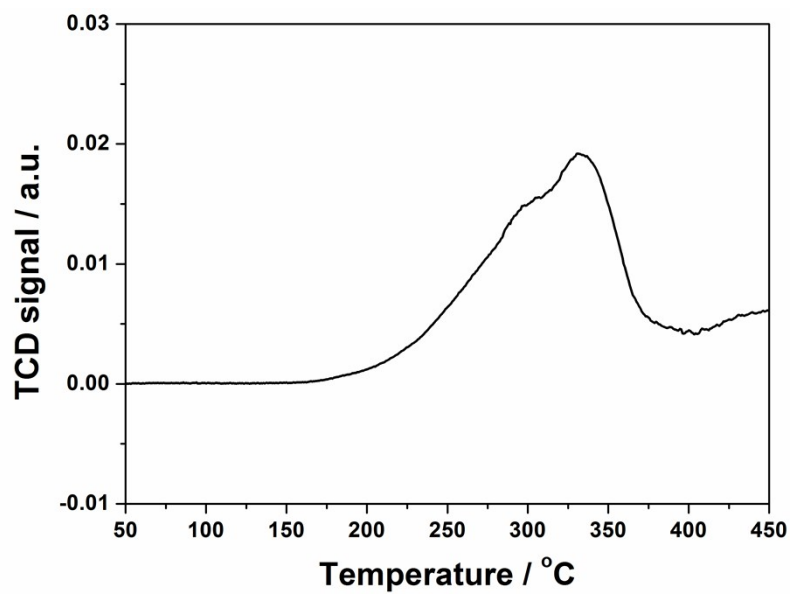

Figure S5 N<sub>2</sub>-TPD profiles of the as-prepared BiO catalyst.

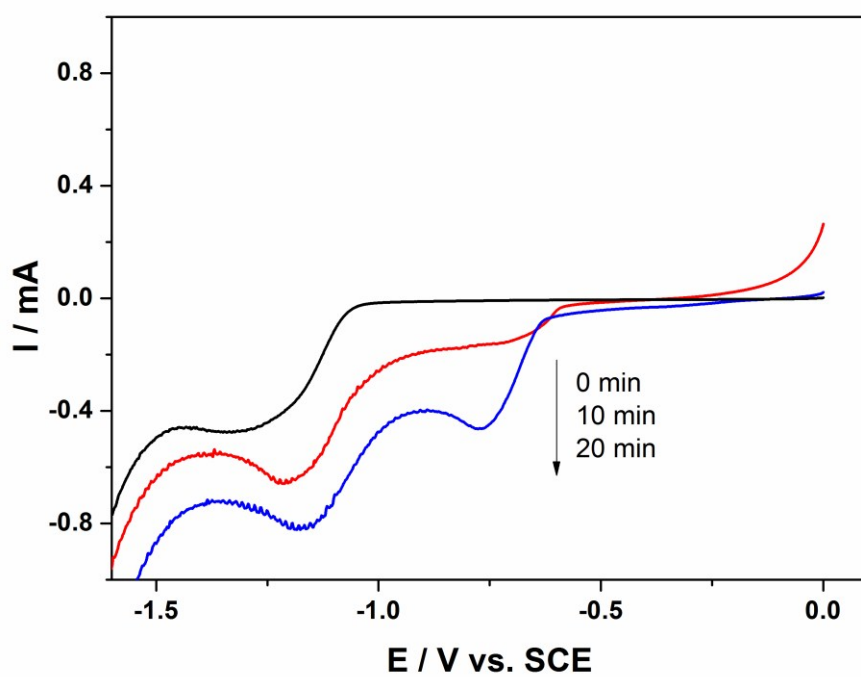

**Figure S2**

Figure S6 Changes of cathodic peaks for  $\text{N}_2$  reduction on BiO electrode along with the scan time in  $\text{N}_2$  saturated 0.5 M  $\text{Na}_2\text{SO}_4$  at pH 3.8. Scan rate: 100 mV/s.

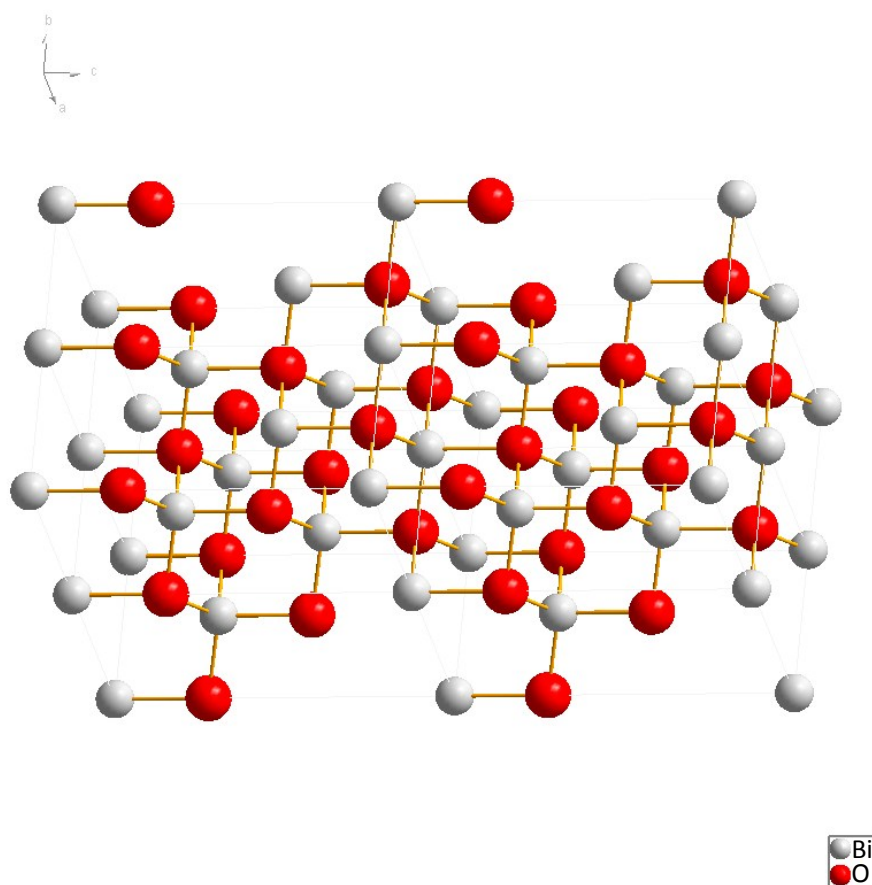

Figure S7 Schematic crystal structure of BiO which clearly shows the coordination environment of Bi and O atoms.

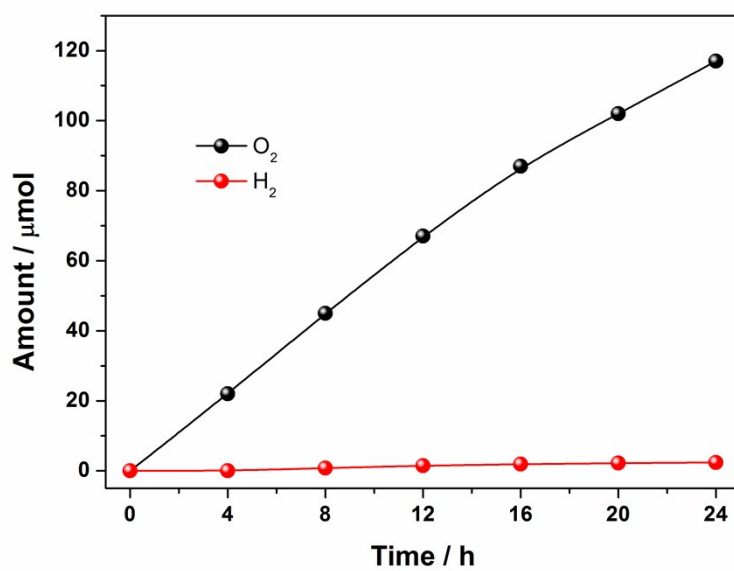

Figure S8 Hydrogen and oxygen evolution during the photocatalytic ammonia synthesis process in a closed reaction system.
